# Supplementary material for: A Reflectivity Enhanced 3D Optical Storage Nanostructure Application Based on Direct Laser Writing Lithography
Source: MDPI journal article supplement (doi:10.3390/ma16072668), 2023-03-27
Supplement: s1 [file s1]

Supplementary

# A Reflectivity Enhanced 3D Optical Storage Nanostructure Application Based on Direct Laser Writing Lithography

Lei Song <sup>1,†</sup>, Dekun Yang <sup>1,†</sup>, Zhidan Lei <sup>1,†</sup>, Qimeng Sun <sup>1</sup>, Zhiwen Chen <sup>1,\*</sup> and Yi Song <sup>1,2,\*</sup>

Sample images with different slope angle fabricated by the laser direct writing device

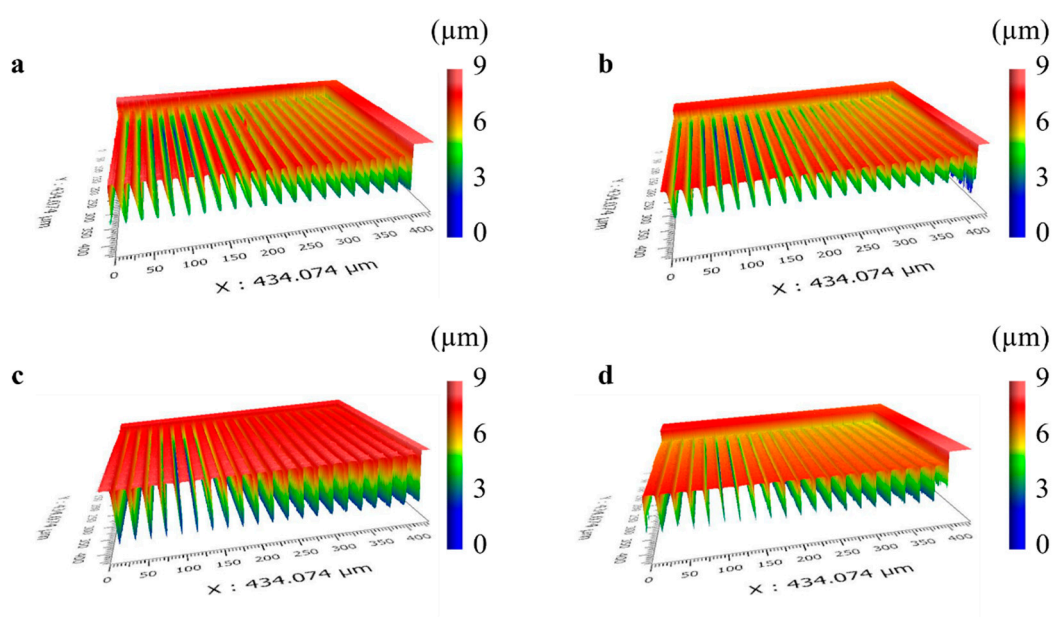

**Figure S1.** Image of 3D lithographic structure taken with 3D optical profilometer. **a** Sample with 60° slope angle structure, **b** Sample with 62.5° slope angle structure, **c** Sample with 65° slope angle structure, **d** Sample with 67.5° slope angle structure.

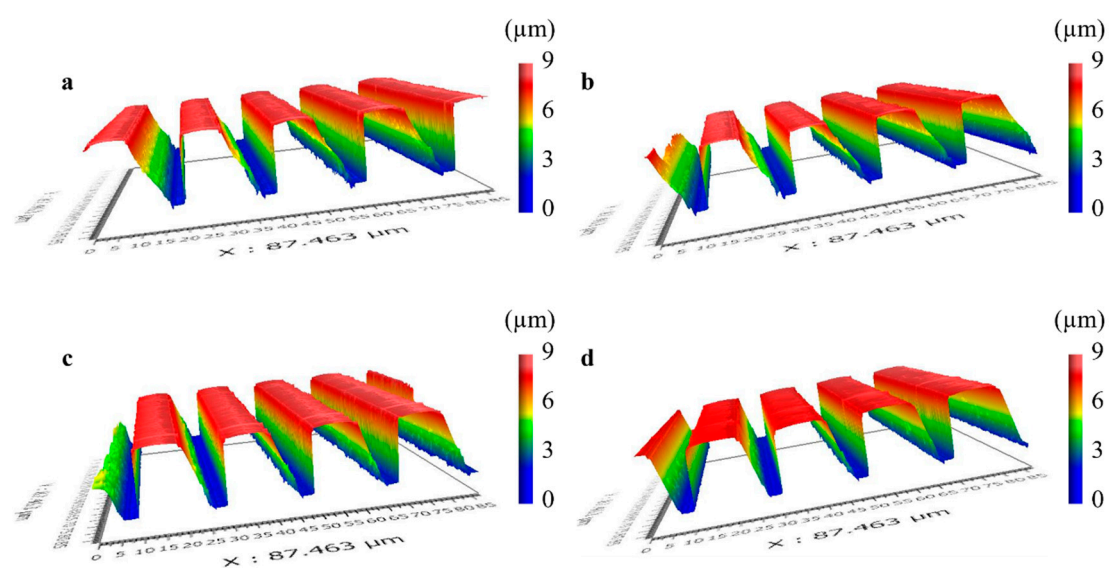

**Figure S2.** Image of 3D lithographic structure taken with 3D optical profilometer. **a** Sample with 60° slope angle structure, **b** Sample with 62.5° slope angle structure, **c** Sample with 65° slope angle structure, **d** Sample with 67.5° slope angle structure.
